# Supplementary material
Source: PubMed Central journal article supplement (PMC3727327)
Supplement: d-69-01447-sup1.pdf [file d-69-01447-sup1.pdf]

**Supplementary Table S1.** List of double conformations in all BT models. Only the occupancy of the A conformation is indicated, the B conformation is complementary. The minus sign ('-') indicates that no additional conformation was modeled.

|                |      | <b>model</b> |            |            |            |            |
|----------------|------|--------------|------------|------------|------------|------------|
| <b>residue</b> |      | <b>BT1</b>   | <b>BT2</b> | <b>BT3</b> | <b>BT4</b> | <b>BT5</b> |
| Val            | 31   | 0.64         | 0.60       | 0.62       | 0.62       | 0.58       |
| Tyr            | 39   | 0.55         | 0.55       | 0.43       | 0.50       | 0.38       |
| Asn            | 48   | 0.64         | 0.61       | 0.62       | 0.57       | 0.59       |
| Gln            | 50   | 0.57         | 0.59       | 0.73       | 0.66       | 0.56       |
| Val            | 53   | 0.56         | 0.59       | 0.55       | 0.58       | 0.64       |
| Leu            | 67   | 0.49         | 0.55       | 0.60       | 0.55       | 0.59       |
| Ser            | 84   | 0.63         | 0.62       | 0.65       | 0.56       | 0.61       |
| Ser            | 86   | 0.73         | 0.73       | 0.81       | 0.83       | 0.78       |
| Lys            | 87   | 0.57         | 0.62       | -          | -          | -          |
| Ser            | 88   | 0.72         | 0.70       | 0.62       | 0.62       | 0.64       |
| Pro            | 92   | -            | 0.66       | 0.58       | 0.69       | 0.64       |
| Met            | 104  | 0.59         | 0.60       | 0.57       | 0.56       | 0.54       |
| Ser            | 113  | 0.69         | 0.71       | 0.65       | 0.70       | 0.71       |
| Arg            | 117  | 0.51         | 0.61       | 0.60       | 0.55       | 0.70       |
| Ser            | 120  | 0.76         | 0.71       | 0.68       | 0.70       | 0.69       |
| Ser            | 122  | 0.77         | 0.72       | 0.67       | 0.73       | 0.73       |
| Pro            | 124  | 0.56         | 0.60       | 0.71       | 0.56       | 0.59       |
| Thr            | 125  | 0.56         | 0.60       | 0.71       | 0.56       | 0.59       |
| Ser            | 127  | 0.56         | 0.60       | 0.71       | 0.56       | 0.59       |
| Thr            | 134  | 0.64         | 0.62       | 0.56       | 0.53       | 0.52       |
| Gln            | 135  | 0.64         | 0.62       | 0.56       | 0.53       | 0.52       |
| Lys            | 145  | 0.67         | 0.61       | 0.62       | 0.52       | 0.69       |
| Ser            | 147  | 0.58         | 0.54       | 0.62       | 0.60       | 0.65       |
| Gly            | 148  | 0.58         | 0.54       | 0.62       | 0.60       | 0.65       |
| Thr            | 149  | 0.58         | 0.54       | 0.62       | 0.60       | 0.65       |
| Pro            | 152  | 0.69         | 0.72       | 0.78       | 0.74       | 0.69       |
| Asp            | 153  | 0.69         | 0.72       | 0.78       | 0.74       | 0.69       |
| Lys            | 156  | 0.55         | 0.56       | 0.55       | 0.50       | 0.54       |
| Asp            | 165  | 0.56         | 0.55       | 0.70       | 0.58       | 0.62       |
| Ser            | 170  | 0.76         | 0.71       | 0.75       | 0.66       | 0.71       |
| Lys            | 1188 | 0.59         | 0.56       | 0.56       | 0.66       | 0.58       |
| Gln            | 192  | 0.61         | 0.56       | 0.51       | 0.57       | 0.55       |
| Ser            | 217  | 0.68         | 0.65       | 0.63       | 0.63       | 0.63       |
| Lys            | 224  | 0.80         | 0.64       | 0.59       | 0.57       | 0.75       |
| Ser            | 236  | 0.42         | 0.50       | 0.41       | 0.42       | 0.41       |
| Gln            | 240  | 0.56         | 0.67       | 0.76       | 0.76       | 0.71       |
| Ser            | 244  | 0.65         | 0.65       | 0.56       | 0.60       | 0.60       |

**Supplementary Table S2.** Pairwise  $\sigma$  level of the occupancies of ligand and solvent molecules in all BT models. The column title BT1-BT2 indicates that the distances between BT1 and BT2 are compared.

|              | BT1-BT2 | BT1-BT3 | BT1-BT4 | BT1-BT5 | BT2-BT3 | BT2-BT4 | BT2-BT5 | BT3-BT4 | BT3-BT5 | BT4-BT5 |
|--------------|---------|---------|---------|---------|---------|---------|---------|---------|---------|---------|
| <b>BEN-A</b> | 1.2     | 0.9     | 2.0     | 0.4     | 0.1     | 1.0     | 0.6     | 0.6     | 0.6     | 1.4     |
| <b>BEN-B</b> | 1.2     | 0.9     | 2.0     | 0.4     | 0.1     | 1.0     | 0.6     | 0.6     | 0.6     | 1.4     |
| <b>SO4-1</b> | 0.8     | 6.8     | 0.7     | 4.1     | 6.5     | 1.5     | 3.7     | 7.5     | 2.2     | 4.8     |
| <b>SO4-2</b> | 3.8     | 9.6     | 14.5    | 10.8    | 6.8     | 12.5    | 8.2     | 5.8     | 1.8     | 3.8     |
| <b>GOL</b>   | 8.5     | 11.3    | 16.3    | 10.6    | 2.8     | 7.8     | 2.1     | 4.9     | 0.7     | 5.7     |
